# Supplementary material for: Design of a Multi-Epitope Vaccine against Tuberculosis from Mycobacterium tuberculosis PE_PGRS49 and PE_PGRS56 Proteins by Reverse Vaccinology
Source: MDPI journal article supplement (doi:10.3390/microorganisms11071647), 2023-06-24
Supplement: s1 [file s1]

## Supplementary Material

**Table S1.** B cell epitopes identified with the IMED server of PE\_PGRS49 and PE\_PGRS56 proteins

| Protein   | Ubication | Sequence            |
|-----------|-----------|---------------------|
| PE_PGRS49 | 14-20     | HGGPATN             |
|           | 58-73     | GSFGATSGPASIGVTG    |
|           | 109-120   | GSIGANSGIVGG        |
|           | 132-138   | GNGSLSS             |
|           | 154-162   | VGGNSSVTQ           |
|           | 175-182   | GGSGFFGG            |
|           | 197-206   | GGGTVGTVAG          |
|           | 209-215   | GNGGVGG             |
|           | 217-225   | GGDGVFAGA           |
|           | 227-233   | GQGGLGG             |
|           | 276-284   | GGGTQSATG           |
|           | 301-307   | SGAKAGG             |
| PE_PGRS56 | 12-18     | GDGGVGG             |
|           | 26-34     | NTTTAAAGT           |
|           | 37-43     | GAGGAGG             |
|           | 81-91     | GDGALAGSSGG         |
|           | 101-113   | DAGKAGTGSAPGT       |
|           | 126-144   | GGIGAAGTTGPVGTGASGG |
|           | 161-169   | ANGGTAGAG           |
|           | 181-190   | GGAGVTSSTA          |
|           | 204-219   | GDAGAGGAGATPGANG    |
|           | 228-242   | GDGAAGAVGISGATG     |
|           | 262-273   | GAGGSGIDGVGG        |
|           | 284-294   | NGAIGGAGGDA         |
|           | 314-320   | GAGGAAG             |
|           | 322-328   | NGGTVGA             |
|           | 339-346   | GAAGAATA            |
|           | 376-382   | GIGGVGG             |
|           | 389-401   | ADGEVGGAGGAGG       |
|           | 419-432   | GSGGAGGAAGAGGA      |
|           | 452-461   | GGAGAASSAT          |
|           | 488-495   | GTGGAAGD            |
|           | 500-516   | GQGGAGGGAGGQGGAGG   |
|           | 531-537   | TAGTAGA             |
|           | 576-589   | GDRTVGGGTVPAGS      |
|           | 600-609   | GAGGQGGADG          |
|           | 751-757   | GDGGLTG             |
|           | 783-789   | NMTAQAG             |
|           | 800-815   | FGGGAGAGGGGLTAGA    |
|           | 829-841   | GNGAIGGHGPLTD       |
|           | 859-868   | GGAGIGSLGG          |
|           | 885-891   | EGGEVGG             |
|           | 925-936   | GTGGLGDPRVGG        |
|           | 984-998   | DAEPGVPPGAGGAGG     |
|           | 1052-1060 | DGGKAPAGG           |

**Table S2.** T cell epitopes identified with the Rankpep and Propred I servers of PE\_PGRS49 and PE\_PGRS56 proteins

| Alleles          | Epitopes sequence                                                                                                                                             |                                                                                                                                                                                                                                                                                                                                                                         |
|------------------|---------------------------------------------------------------------------------------------------------------------------------------------------------------|-------------------------------------------------------------------------------------------------------------------------------------------------------------------------------------------------------------------------------------------------------------------------------------------------------------------------------------------------------------------------|
|                  | PE_PGRS49                                                                                                                                                     | PE_PGRS56                                                                                                                                                                                                                                                                                                                                                               |
| <i>HLA-A0101</i> | (18-26) ATNPGSGSR<br>(320-328) GTEPGFGGD<br>(63-71) TSGPASIGV                                                                                                 |                                                                                                                                                                                                                                                                                                                                                                         |
| <i>HLA_A0201</i> | (110-118) SIGANSIV                                                                                                                                            | (832-839) AIGGHGPL.                                                                                                                                                                                                                                                                                                                                                     |
| <i>HLA_A0301</i> | (135-143) SLSSGEGGK                                                                                                                                           |                                                                                                                                                                                                                                                                                                                                                                         |
| <i>HLA_A2402</i> | (178-186) GFFGGKGGF<br>(128-136) GGAGGNGSL<br>(223-231) AGAGGQGGL<br>(240-248) GSTGGNGGL                                                                      |                                                                                                                                                                                                                                                                                                                                                                         |
| <i>HLA*B0702</i> |                                                                                                                                                               |                                                                                                                                                                                                                                                                                                                                                                         |
| <i>HLA_B0801</i> |                                                                                                                                                               |                                                                                                                                                                                                                                                                                                                                                                         |
| <i>HLA_B1501</i> |                                                                                                                                                               |                                                                                                                                                                                                                                                                                                                                                                         |
| <i>HLA*B3901</i> | (128-136) GGAGGNGSL<br>(223-231) AGAGGQGGL<br>(240-248) GSTGGNGGL<br>(277-285) GGTQSATGL                                                                      |                                                                                                                                                                                                                                                                                                                                                                         |
| <i>HLA_B5801</i> | (63-71) TSGPASIGV<br>(52-60) GGNGGDGSF<br>(109-117) GSIGANSI<br>(171-179) AGGAGGSGF                                                                           |                                                                                                                                                                                                                                                                                                                                                                         |
| <i>DRB1*0101</i> |                                                                                                                                                               | (781-789) TANMTAQAG<br>(1037-1045) WNGGKGDTG<br>(694-702) IAGMGNGG<br>(811-819) LTAGANGTG<br>(527-535) ITGGTAGTA                                                                                                                                                                                                                                                        |
| <i>DRB1*0301</i> |                                                                                                                                                               | (29-37) TAAAGTTGG<br>(208-216) AGGAGATPG<br>(579-587) TVGGGTVPA<br>(159-167) GAANGGTAG<br>(339-347) GAAGAATAG<br>(780-788) NTANMTAGA<br>(433-441) GGGANGTAG<br>(996-1004) AGGAGTTGG<br>(102-110) AGKAGTGSA<br>(325-333) TVGANGTGG<br>(104-112) KAGTGSAPG<br>(22-30) NGADNTTTA<br>(128-136) IGAAGTTGP<br>(51-59) GGAAGTGTG<br>(537-545) AAGNGGAAG<br>(812-820) TAGANGTGG |
| <i>DRB1*0401</i> | (222-230) FAGAGGQGG<br>(302-310) GAKAGGAGG<br>(274-282) GIGGGTQSA<br>(262-270) GFGGNGGKG<br>(278-286) GTQSATGLG<br>(225-233) AGGQGGGLG<br>(179-187) FFGGKGGFG |                                                                                                                                                                                                                                                                                                                                                                         |

|                  |                                            |                                                                                             |
|------------------|--------------------------------------------|---------------------------------------------------------------------------------------------|
| <i>DRB1*0701</i> |                                            | (333-GGAAGAATA                                                                              |
| <i>DRB1*0801</i> |                                            |                                                                                             |
| <i>DRB1*1101</i> | (263-271) FGGNGGKGG<br>(111-119) IGANSGIVG | (1036-1044) GWNGGKGD<br>(645-653) GGANGGAGG<br>(585-593) VPAGSGGQG<br>(1034-1042) GTAWNGGKG |
| <i>DRB1*1301</i> |                                            |                                                                                             |
| <i>DRB1*1501</i> | (177-185) SGFFGGKGG                        |                                                                                             |

---

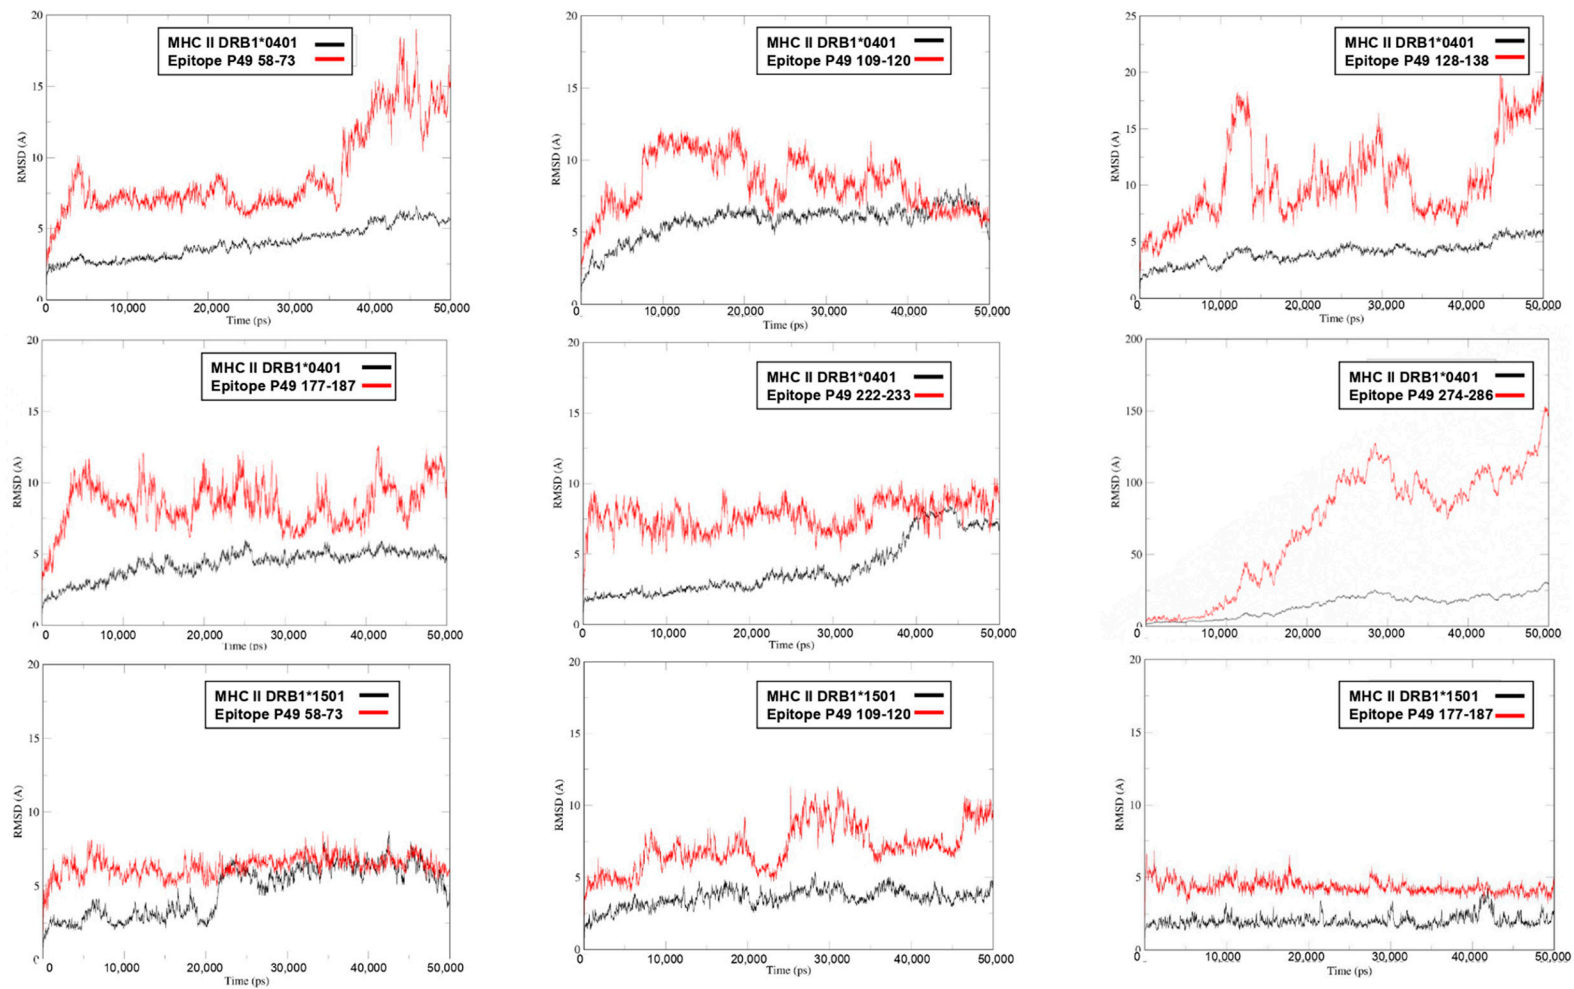

**Figure S1.** Molecular dynamics simulation of the epitope-receptor complex. The plots are showing the RMSD (X-axis = time in Frame and Y-axis = RMSD) of the epitopes PE\_PGRS49 (red) and DRB1\*0401 or DRB1\*1501 (black). The most stable interaction is shown between the 222-233 and 177-187 epitope complex with DRB1\*0401, The most stable interaction is shown between the 177-187 epitope complex with DRB1\*1501.

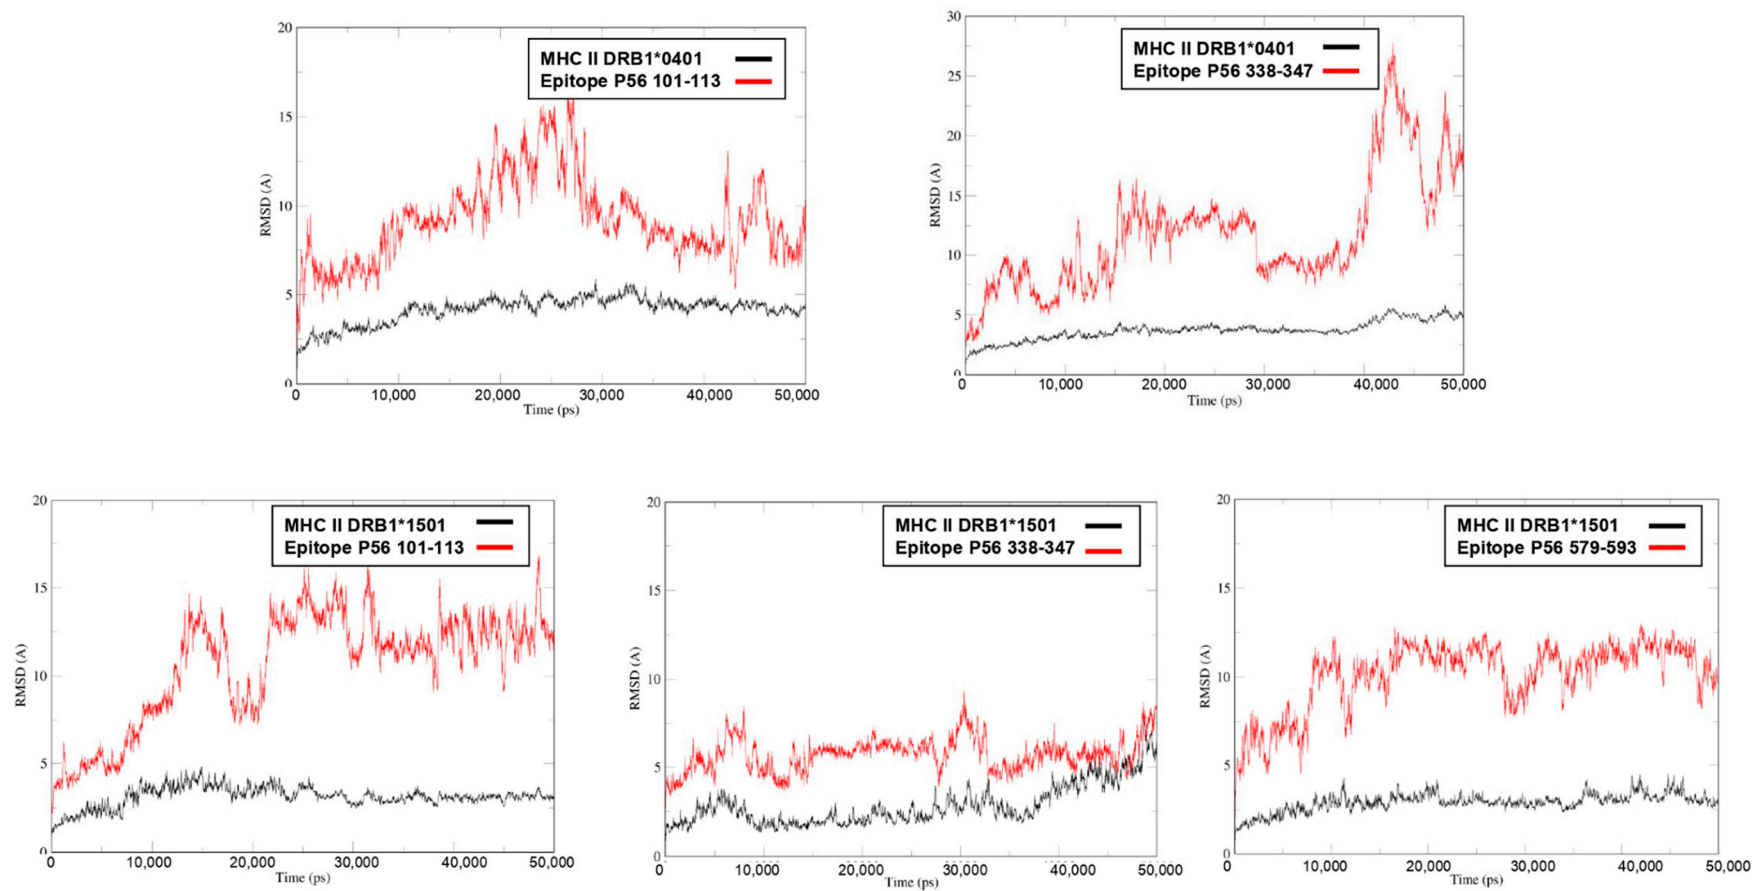

**Figure S2.** Molecular dynamics simulation of the epitope-receptor complex. The plots are showing the RMSD (X-axis = time in Frame and Y-axis = RMSD) of the epitopes (red) PE:PGRS56 and DRB1\*1501 or DRB1\*1501 (black). The most stable interaction is shown between the 338-347 epitope complex with DRB1\*1501 and 579-593 epitope-DRB1\*1501 showed an unstable interaction.

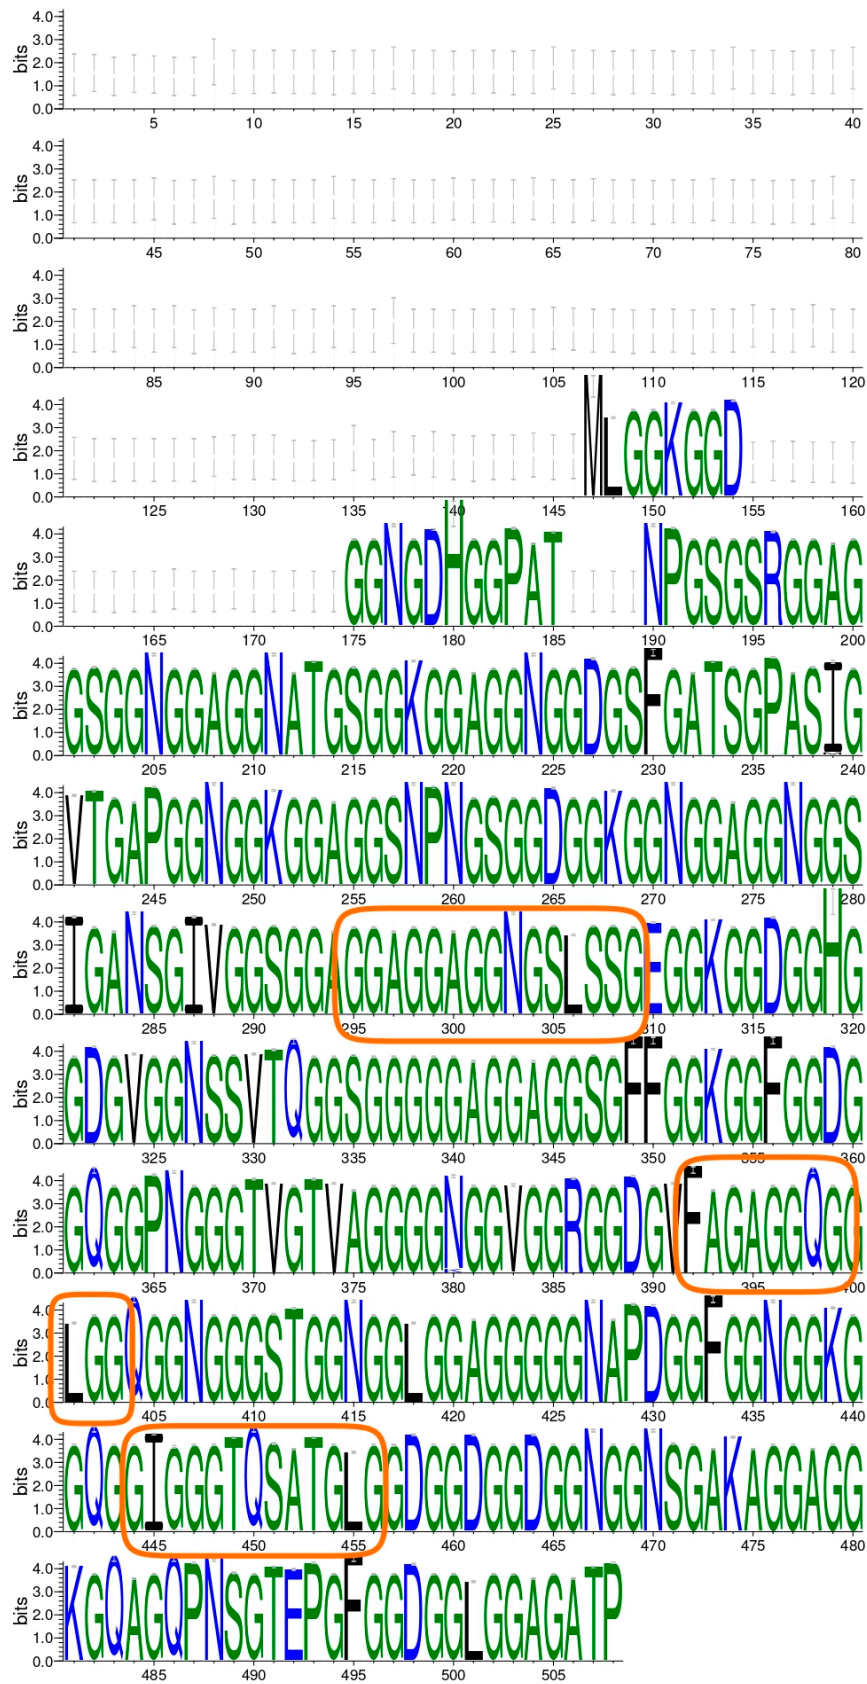

WebLogo 3.7.12

**Figure S3. Graphic representation of the sequence alignment of the PE-PGRS49 protein.** The red boxes indicate the location of the selected epitopes, all of which are in conserved regions.



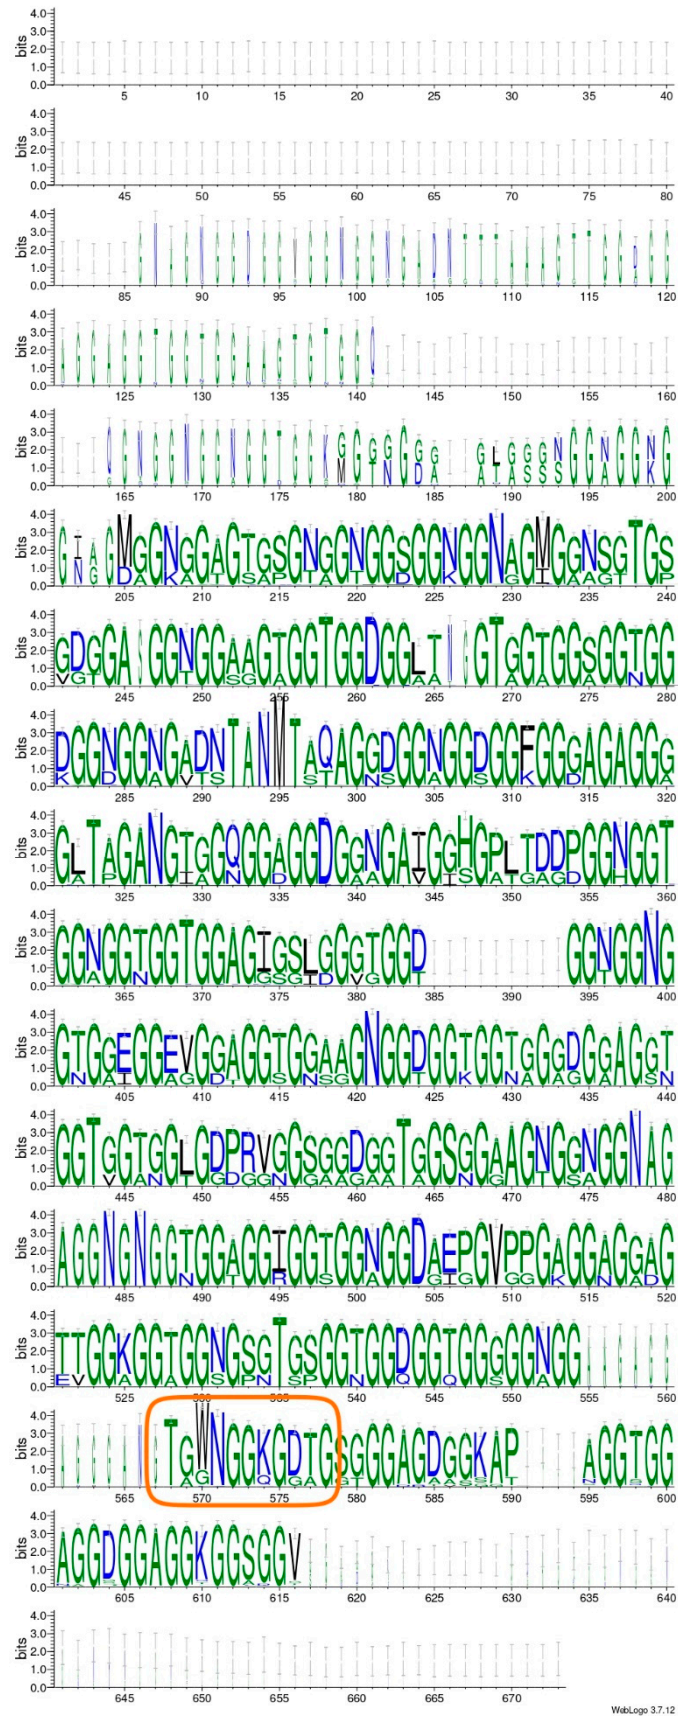

**Figure S4. Graphic representation of the sequence alignment of the PE-PGRS56 protein.** The red boxes indicate the location of the selected epitope, which is found in a conserved region.
